# Supplementary material
Source: PubMed Central journal article supplement (PMC4432160)
Supplement: AAC.04650-14_zac006153970so1.pdf [file AAC.04650-14_zac006153970so1.pdf]

## Supplemental material

### Supplementary figures

Figure S1

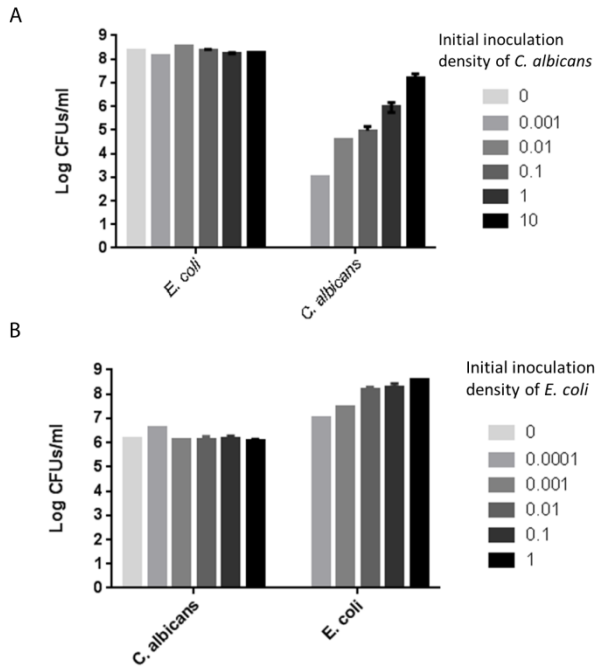

**Figure S1. *C. albicans* and *E. coli* do not affect each other's density during biofilm formation.** (A) *C. albicans* does not affect the density of *E. coli* in an *E. coli* / *C. albicans* biofilm. *E. coli* / *C. albicans* biofilms were grown after mixing a fixed inoculation density of *E. coli* (OD 0.001) and varying inoculation densities of *C. albicans* (OD 0-10). (B) *E. coli* does not affect the density of *C. albicans* in an *E. coli* / *C. albicans* biofilm. *E. coli* / *C. albicans* biofilms were grown after mixing a fixed inoculation density of *C. albicans* (OD 1) and varying inoculation densities of *E. coli* (OD 0-1). Biofilms were quantified using selective plating. Note that increasing the inoculation densities of *E. coli* or *C. albicans* does increase the number of *E. coli* and *C. albicans* cells, respectively, in a mature *E. coli* / *C. albicans* biofilm.

**Figure S2**

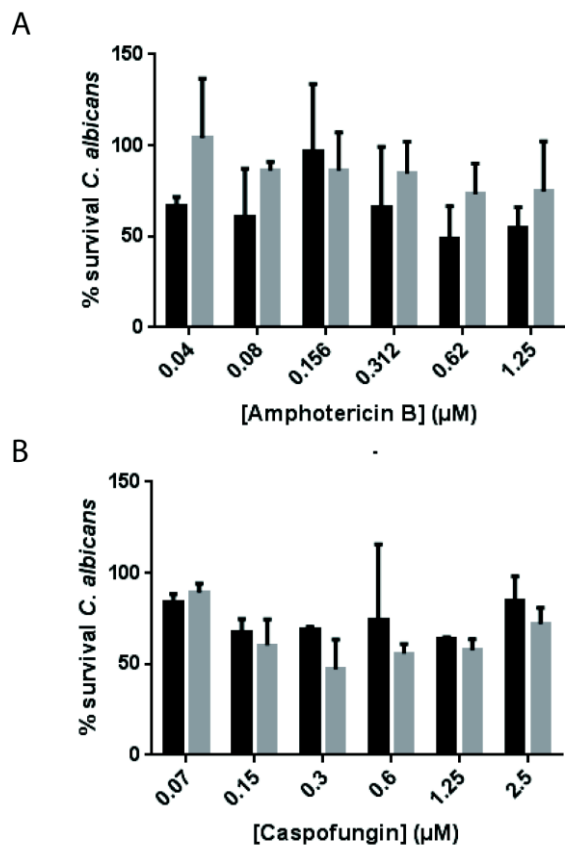

**Figure S2. Tolerance of *C. albicans* to amphotericin B or caspofungin is not altered in an *E. coli* / *C. albicans* biofilm, compared to an axenic *C. albicans* biofilm.** *C. albicans* (black bars) and *E. coli* / *C. albicans* (grey bars) biofilms were treated with different concentrations of (A) amphotericin B (0.04 – 1.25  $\mu\text{M}$ ) or (B) caspofungin (0.07 – 2.5  $\mu\text{M}$ ). Afterwards, survival of *C. albicans* was quantified using selective plating.

**Figure S3**

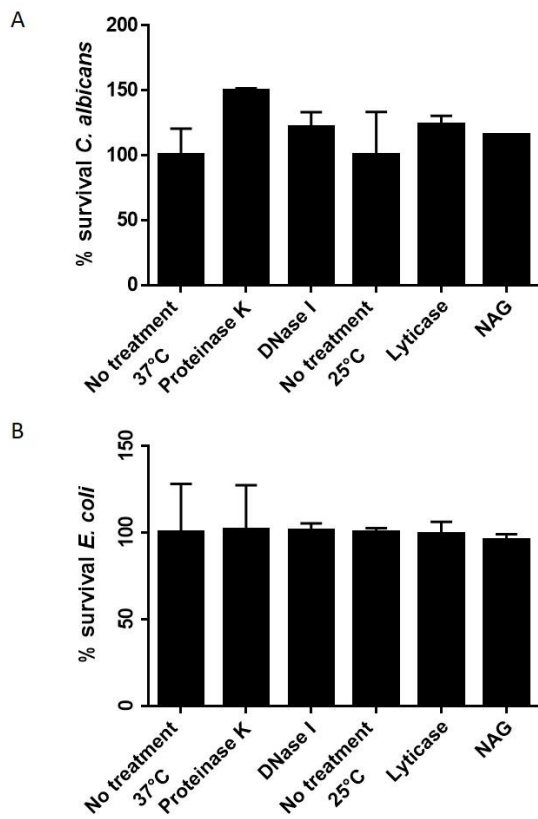

**Figure S3. Enzyme treatment does not affect survival of *C. albicans* and *E. coli*.** Survival of *C. albicans* (A) and *E. coli* (B) cells upon treatment of 50 µg/ml enzyme for 2h at 37°C (proteinase K and DNase I) or at 25°C (lyticase and N-acetylglucosaminidase (NAG)).

**Figure S4**

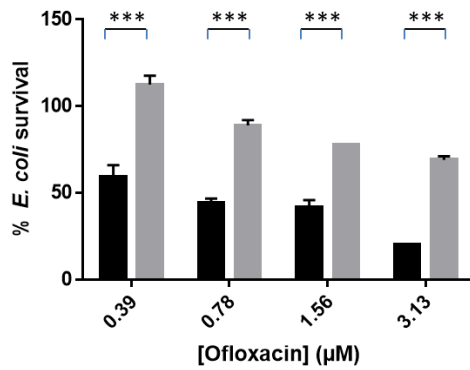

**Figure S4. Exogenously added laminarin increases ofloxacin-tolerance of *E. coli* in an *E. coli* biofilm.** An *E. coli* biofilm was treated with different concentrations of ofloxacin in the absence (black bars) or presence (grey bars, 500 mg/ml) of laminarin. Survival was quantified using CFUs. A representative experiment is shown. \*\*\* < 0.001.
